# Supplementary material for: Heparanase Localization during Palatogenesis in Mice
Source: Hindawi journal article supplement (doi:10.1155/2013/760236), 2013-01-01
Supplement: f1 [file 760236.f1.pdf]

## **Supplemental data**

### **Figure legend**

Figure S1: Negative control, in which the primary antibody was omitted, is shown. Adjacent section to Figure 1F and Figure 4A. O, oropharynx; N; nasopharynx. Bars: 25  $\mu$ m.

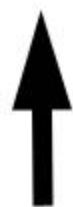

Cont

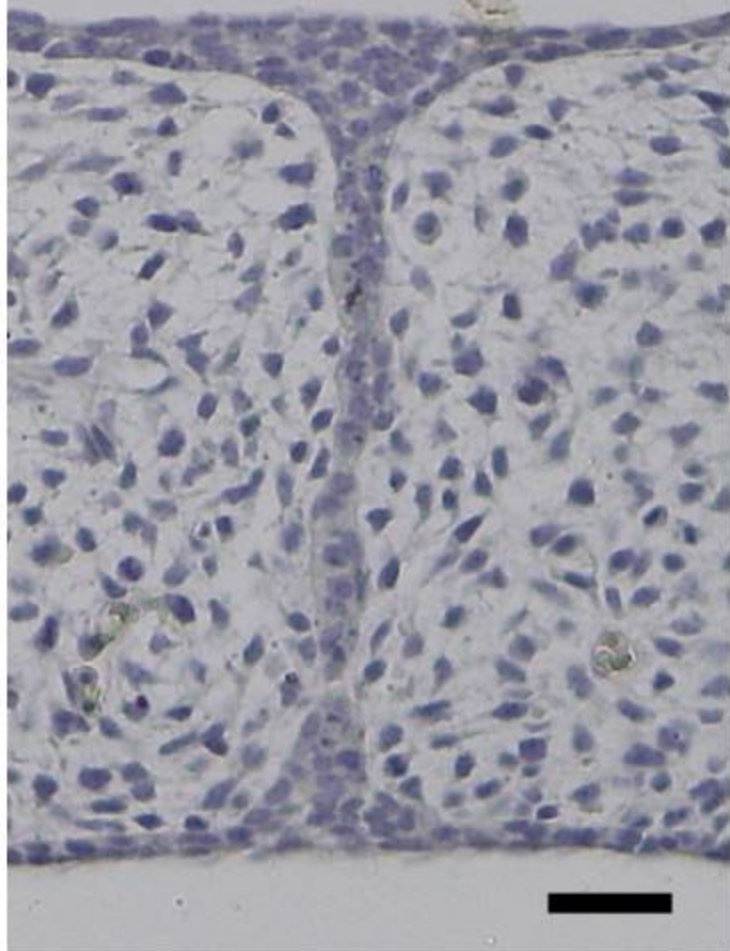

Figure S1. Hirata, A., et al.
